# Supplementary material for: Controlled hydrothermal synthesis of tri-wing tellurium nanoribbons and their template reaction
Source: Royal Society of Chemistry journal article supplement (doi:10.1039/c1ce05734k), 2011-10-18
Supplement: c1ce05734k.pdf [file c1ce05734k.pdf]

## Supplementary Information for

### Controlled Hydrothermal Synthesis of Tri-wing Tellurium Nanoribbons and their Template Reaction

Hangtian Zhu,<sup>a,b</sup> Jun Luo,<sup>\*b</sup> He Zhang,<sup>a,b</sup> Jingkui Liang,<sup>b,c</sup> Guanghui Rao,<sup>b</sup> Jingbo Li,<sup>b</sup> Guangyao Liu,<sup>b</sup> and Zhenmin Du<sup>a</sup>

\* Corresponding author. E-mail: jluo@aphy.iphy.ac.cn

#### 1. Chemical reaction mechanism

In order to elucidate the influence of pH value on the reaction rate, it is necessary to give a picture of the reaction mechanism. However, the reaction mechanism of  $\text{H}_2\text{PO}_2^-$  as a reducing agent is still controversial and the studies on the reduction reaction of  $\text{TeO}_3^{2-}$  is insufficient. Up to now, only a likely reaction mechanism can be given.

Firstly and most importantly,  $\text{H}_2\text{TeO}_3$  is an important intermediate for the reduction reaction and should be formed at the beginning.<sup>1</sup> The concentration of  $\text{H}_2\text{TeO}_3$  is pH value dependent, which consequently influences reduction reaction rate. A likely reaction scheme is as follows.<sup>1</sup>

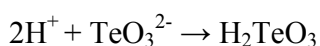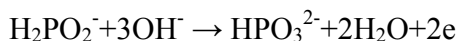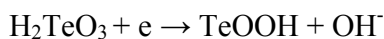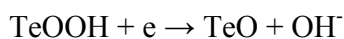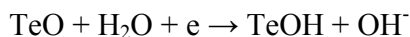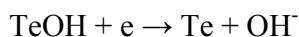

The total reaction equation is:

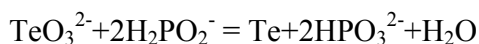

## 2. SEM image of the Te nanostructures

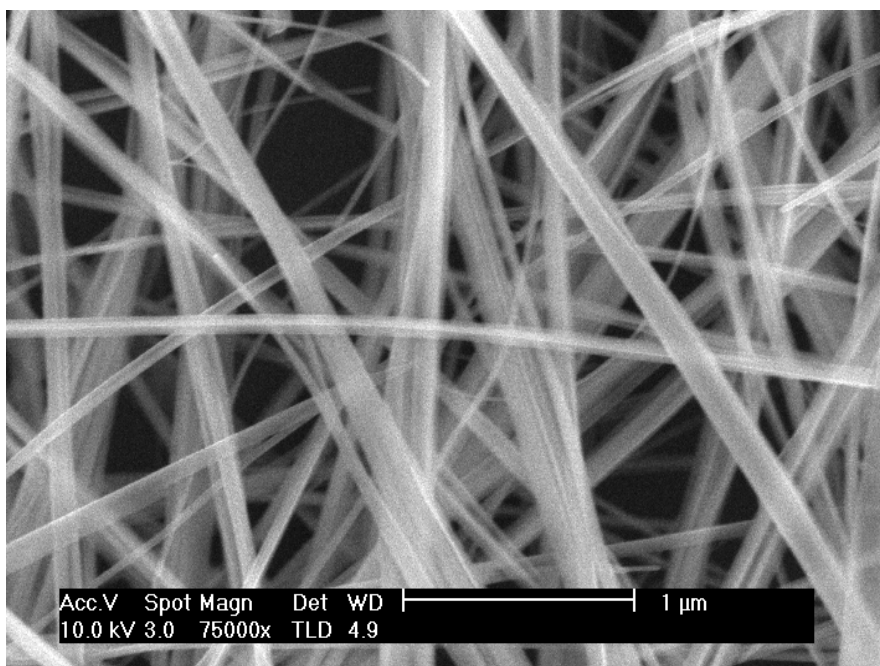

**Figure S1.** SEM image of the product synthesized at 120 °C for 12 h with 10 mg NaOH and 123 mg PVA.

### Reference

- [1]. L. Berg, V. Haase, I. Hinz, G. Kirschstein, H.-J. Richter-Ditten and J. Wagner, in *Gmelin Handbook of Inorganic Chemistry*, eds. G. Czack, D. Koschel and H. K. Kugler, Springer-Verlag, Berlin, 8th edn., 1983, vol. Supplement volume A2, p. 288.
